# Supplementary material
Source: publisher site journal article supplement (https://www.dovepress.com/article/529335)
Supplement: Supplementary file 1 [file 528335%20Supplementary%20Material.docx]

# Supplementary Materials

**Table S1** Parameters Utilized for Machine Learning Models

| **Model** | **Parameter** | **Value/Setting** |
| --- | --- | --- |
| **Logistic Regression** | Variable selection method | Backward stepwise (AIC-based) |
|  | Regularization | Not applied |
| **K-Nearest Neighbors** | Number of neighbors (k) | 5 |
|  | Distance metric | Euclidean |
| **Support Vector Machine** | Kernel | poly |
|  | degree | 2 |
|  | Gamma | Scale |
| **Decision Tree** | Maximum depth | 40 |
|  | Minimum samples per leaf | 4 |
|  | Splitting criterion | Gini |
| **Random Forest** | Number of trees (n_estimators) | 50 |
|  | Maximum depth | 20 |
|  | Max features | 0.2 |
| **Gradient Boosting Machine** | Learning rate | 0.1 |
|  | Number of trees | 50 |
|  | Maximum depth | 5 |
| **Extreme Gradient Boosting** | Learning rate (eta) | 0.3 |
|  | Max depth | 7 |
|  | Subsample | 0.9 |
|  | Colsample by tree | 0.9 |
|  | Number of estimators | 100 |
